# Supplementary material for: Public health aspects of Vibrio spp. related to the consumption of seafood in the EU
Source: PubMed Central journal article supplement (PMC11263920; doi:10.2903/j.efsa.2024.8896), 2024-07-23
Supplement: EFS2-22-e8896-s001.pdf [file EFS2-22-e8896-s001.pdf]

Annex to: EFSA’s BIOHAZ Panel Scientific opinion “Public health aspects of *Vibrio* spp. related to the consumption of seafood in the EU”.  
doi:10.2903/j.efsa.2024.8886

© European Food Safety Authority, 2024

## Annex C – *Vibrio parahaemolyticus*, *Vibrio vulnificus* and non-O1/non-O139 *Vibrio cholerae* human cases associated with seafood consumption in Europe

**Table C.1:** Summary of the available information on *Vibrio parahaemolyticus*, *Vibrio vulnificus* and non-O1, non-O139 *Vibrio cholerae* human cases associated to seafood consumption in the EU.

| <i>Vibrio</i> species        | Country                | Year       | No of outbreaks | No of cases    | Hospita-<br>lisation | Sex     | Age                  | Transmission                                         | Co-morbidities                                    | Symptoms                                                                      | Outcome  | Reference               |
|------------------------------|------------------------|------------|-----------------|----------------|----------------------|---------|----------------------|------------------------------------------------------|---------------------------------------------------|-------------------------------------------------------------------------------|----------|-------------------------|
| Vc non-O1/non-O139           | Finland                | 2003 (Aug) | NA              | 1              | 1                    | M       | 54                   | Seafood (home-salted whitefish) and seawater contact | Alcoholic liver cirrhosis                         | Abdominal pain, infection progressing into invasive abdominal infection       | Death    | Lukinmaa et al. (2006)  |
| Vc non-O1/non-O139           | France                 | 2009 (Aug) | NA              | 1              | 1                    | M       | 63                   | Seafood (undercooked shrimps)                        | Chronic liver disease                             | Fever, jaundice, ascites and encephalopathy without gastrointestinal symptoms | Recovery | Petsaris et al. (2010)  |
| Vc non-O1/non-O139           | France (Bay of Biscay) | 2001–2019  | –               | 6 <sup>a</sup> | –                    | M (70%) | 69 ± 20 <sup>b</sup> | – <sup>c</sup>                                       | –                                                 | GE                                                                            | –        | Hoefler et al. (2022)   |
| Vc non-O1/non-O139           | Germany                | 2018–2019  | –               | 4 <sup>a</sup> | –                    | –       | –                    | –                                                    | –                                                 | GE                                                                            | –        | Brehm et al. (2021)     |
| Vc non-O1/non-O139           | Germany                | 2018–2019  | NA              | 1              | 1                    | M       | 80s                  | Seafood (crab meat)                                  | Unspecified chronic disease and immunosuppression | GE                                                                            | Death    | Brehm et al. (2021)     |
| Vc non-O1/non-O139 (Vc O176) | Italy                  | 2006 (Aug) | NA              | 1              | 1                    | M       | 44                   | Seafood (cooked prawns)                              | No                                                | Watery diarrhoea and vomiting                                                 | –        | Ottaviani et al. (2009) |
| Vc non-O1/non-O139           | Italy                  | 2006 (Sep) | NA              | 1              | 1                    | F       | 26                   | Seafood (mussels)                                    | No                                                | Watery diarrhoea                                                              | –        | Ottaviani et al. (2009) |

Public health aspects of *Vibrio* spp. related to the consumption of seafood in the EU

O139 (Vc O37)

|                                   |                                            |               |    |                  |   |   |          |                                                                         |                                                                                                                                                                                           |                                                                                                                                  |          |                           |
|-----------------------------------|--------------------------------------------|---------------|----|------------------|---|---|----------|-------------------------------------------------------------------------|-------------------------------------------------------------------------------------------------------------------------------------------------------------------------------------------|----------------------------------------------------------------------------------------------------------------------------------|----------|---------------------------|
| Vc non-O1/non-O139                | Italy                                      | 2016 (Jul)    | NA | 1                | 1 | M | 83       | Seafood (defrosted clams harvested by the patient) and seawater contact | Chronic obstructive pulmonary disease, alcohol abuse, cholecystectomy, resection of intestinal polyps complicated by intestinal perforation, colon diverticula, and systemic hypertension | Fever, tachycardia, and abdominal pain; no diarrhoea, nausea, or vomiting. Infection progressing into bacteriemia and pneumonia. | Recovery | Marinello et al. (2017)   |
| Vc non-O1/non-O139                | Northern European countries <sup>(e)</sup> | 2018          | -  | 3 <sup>(a)</sup> | - | - | -        | Food/Water                                                              | -                                                                                                                                                                                         | -                                                                                                                                | -        | Amato et al. (2022)       |
| Vc non-O1/non-O139                | The Netherlands                            | 2006 (summer) | NA | 1                | 1 | M | late 60s | Seafood (raw herring)                                                   | Heart disease, insulin-dependent diabetes mellitus type II, cholecystectomy and aneurysm of the abdominal aorta                                                                           | Severe diarrhoea; dyspnea, low O <sub>2</sub> saturation, tachycardia, fever; sepsis.                                            | Recovery | Engel et al. (2016)       |
| Vc non-O1/non-O139 <sup>(e)</sup> | The Netherlands                            | 2013 (summer) | NA | 1                | 1 | M | 50s      | Seafood (ready-made tuna salad) and seawater contact                    | Tuberculosis, chronic obstructive pulmonary disease, depression, marihuana and excessive alcohol use                                                                                      | Hypothermia, tachycardia, and low O <sub>2</sub> saturation; pneumonia; extensive bullae on the lower extremities; sepsis.       | Death    | Engel et al. (2016)       |
| Vc non-O1/non-O139                | Portugal                                   | 2010 (Dec)    | NA | 1                | 1 | M | 37       | Seafood (raw shrimp)                                                    | Hepatitis C cirrhosis                                                                                                                                                                     | Fever, abdominal pain and watery profuse diarrhea                                                                                | Recovery | Albuquerque et al. (2013) |
| Vc non-O1/non-O139                | UK (Scotland)                              | 2012          | NA | 1                | 1 | M | 74       | Seafood (defrosted prawns, fish and shellfish consumed without heating) | Pancreatitis and bronchial carcinoma                                                                                                                                                      | Severe watery diarrhoea                                                                                                          | Recovery | Marek et al. (2013)       |

Public health aspects of *Vibrio* spp. related to the consumption of seafood in the EU

|                                        |                                            |                |    |                  |   |                |                      |                                                            |    |                                                                   |          |                               |
|----------------------------------------|--------------------------------------------|----------------|----|------------------|---|----------------|----------------------|------------------------------------------------------------|----|-------------------------------------------------------------------|----------|-------------------------------|
| Vp                                     | France                                     | 1997 (Apr)     | 1  | 44               | - | -              | -                    | Seafood (shrimp and shellfish soup)                        | -  | Diarrhoea, abdominal pain, nausea, vomiting, and fever            | -        | Lemoine et al. (1997)         |
| Vp                                     | France                                     | 2001 (Jun)     | 11 | 100              | - | -              | -                    | Seafood (mussels)                                          | -  | -                                                                 | -        | Haeghebaert et al. (2001)     |
| Vp                                     | France (Bay of Biscay)                     | 2001-2019      | -  | 8 <sup>a</sup>   | - | M 75%          | 53 ± 23 <sup>b</sup> | - <sup>d</sup>                                             | -  | GE                                                                | -        | Hoefler et al. (2022)         |
| Vp <i>tdh+</i> O3:K6 (pandemic strain) | Italy                                      | 2007 (summer)  | NA | 1                | 1 | -              | -                    | Seafood (fresh shellfish)                                  | -  | Diarrhoea                                                         | -        | Ottaviani et al. (2008)       |
| Vp <i>tdh+</i> O3:K6 (pandemic strain) | Italy                                      | 2008 (Aug)     | NA | 1                | 1 | F              | 65                   | Seafood (mussels)                                          | No | Diarrhea, abdominal cramps, nausea, and vomiting                  | Recovery | Ottaviani et al. (2010)       |
| Vp <i>trh+</i> O1:KUT                  | Italy                                      | 2008 (Sep)     | NA | 1                | 1 | M              | 55                   | Seafood (mussels)                                          | No | Hypotension, myalgias, fever, and diarrhoea                       | Recovery | Ottaviani et al. (2010)       |
| Vp                                     | Northern European countries <sup>(d)</sup> | 2018           | NA | 1 <sup>(a)</sup> | - | -              | -                    | Food/Water                                                 | -  | -                                                                 | -        | Amato et al. (2022)           |
| Vp Kanagawa+                           | Spain (Catalogna)                          | 1988 (Aug-Oct) | -  | 8                | 0 | -              | -                    | Seafood (fish or shellfish)                                | -  | Acute GE                                                          | Recovery | Molero et al. 1989)           |
| Vp <i>tdh+</i>                         | Spain (Galicia)                            | 1999 (Aug-Sep) | 3  | 64               | 9 | -              | 43 <sup>b</sup>      | Seafood (raw oysters)                                      | -  | Diarrhoea, abdominal cramps, nausea, headache, fever and vomiting | -        | Lozano-Leon et al. (2003)     |
| Vp <i>tdh+</i> O3:K6 (pandemic strain) | Spain (Galicia)                            | 2004 (Jul)     | 1  | 80               | - | -              | -                    | Seafood (boiled crab incorrectly stored after preparation) | -  | GE                                                                | -        | Martinez-Urtaza et al. (2005) |
| Vp <sup>(f)</sup>                      | Spain (Catalogna)                          | 2005 (Sep)     | 1  | 3                | - | M (1)<br>F (2) | 40-50                | Seafood (raw and steamed bivalve molluscs)                 | -  | Watery profuse diarrhoea, severe abdominal                        | -        | Sala et al. (2009)            |

Public health aspects of *Vibrio* spp. related to the consumption of seafood in the EU

|                                                                                           |                                            |            |    |    |   |   |    |                                                       |               |  | pain, nausea and vomiting, and headache (n = 3); fever (n = 2); severe myalgia and bloody diarrhoea (n=1) |           |                               |
|-------------------------------------------------------------------------------------------|--------------------------------------------|------------|----|----|---|---|----|-------------------------------------------------------|---------------|--|-----------------------------------------------------------------------------------------------------------|-----------|-------------------------------|
| Vp <i>tdh+</i> <i>trh+</i> O4:K12 (Pacific Northwest complex; ST36) and other Vp profiles | Spain (Galicia)                            | 2012 (Aug) | 1  | 51 | - | - | -  | Seafood (boiled shrimps cooled with contaminated ice) | -             |  | Diarrhoea, abdominal pain, vomiting, nausea, low-grade fever and fever                                    | -         | Martinez-Urtaza et al. (2016) |
| Vp                                                                                        | The Netherlands                            | 2006-2019  | 1  | 3  | - | - | -  | Seafood (shellfish)                                   | -             |  | -                                                                                                         | -         | Friesema et al. (2022)        |
| Vv                                                                                        | France (oversea territory – New Caledonia) | 2008       |    | 3  | 3 | M | 51 | Seafood (raw oysters)                                 | Alcohol abuse |  | Fever, muscle pains, and bleeding gums; septic shock                                                      | Death (3) | Cazorla et al. (2011)         |
|                                                                                           |                                            |            |    |    |   | F | 67 |                                                       | No            |  |                                                                                                           |           |                               |
|                                                                                           |                                            |            |    |    |   | F | 74 |                                                       | Lupus         |  |                                                                                                           |           |                               |
| Vv                                                                                        | Spain                                      | 1998       | NA | 1  | 1 | - | -  | Seafood (raw oysters)                                 | Cirrhosis     |  | Septic shock and skin lesions                                                                             | Recovery  | García Cuevas et al. (1998)   |

Abbreviations: –, not available/not reported; EU, European Union; F, female; M, male; NA, not applicable; O<sub>2</sub>, oxygen; Vc, *V. cholerae*; Vp, *V. parahaemolyticus*; Vv, *V. vulnificus*; GE, gastroenteritis.

<sup>a</sup>Cases with exposure or symptomatology consistent with seafood-borne infection are reported.

<sup>b</sup>Average age.

<sup>c</sup>Seafood consumption/handling reported in 39% of all vibriosis cases.

<sup>d</sup>Norway, Sweden, Denmark, Finland, Poland and Estonia.

<sup>e</sup>Case misidentified as *V. albensis* in other reports.

<sup>f</sup>Simultaneous detection of Norovirus.

## References

- Albuquerque, A., Cardoso, H., Pinheiro, D., & Macedo, G. (2013). *Vibrio cholerae* non-O1 and non-O139 bacteremia in a non-traveler Portuguese cirrhotic patient: First case report. *Gastroenterologia Y Hepatologia*, 36(5), 309-310. <https://doi.org/10.1016/j.gastrohep.2012.09.002>
- Amato, E., Riess, M., Thomas-Lopez, D., Linkevicius, M., Pitkanen, T., Wolkowicz, T., Rjabinina, J., Jernberg, C., Hjertqvist, M., MacDonald, E., Antony-Samy, J. K., Bjerre, K. D., Salmenlinna, S., Fuursted, K., Hansen, A., & Naseer, U. (2022). Epidemiological and microbiological investigation of a large increase in vibriosis, northern Europe, 2018. *Eurosurveillance*, 27(28), 12. <https://doi.org/10.2807/1560-7917.Es.2022.27.28.2101088>
- Brehm, T. T., Berneking, L., Martins, M.S., Dupke, S., Jacob, D., Drechsel, O., Bohnert, J., Becker, K., Kramer, A., Christner, M., Aepfelbacher, M., Schmiedel, S., Rohde, H., & German Vibrio Study G (2021). Heatwave-associated *Vibrio* infections in Germany, 2018 and 2019. *Eurosurveillance*, 26(41), 2002041. <https://doi.org/10.2807/1560-7917.Es.2021.26.41.2002041>
- Cazorla, C., Guigon, A., Noel, M., Quilici, M. L., & Lacassin, F., 2011. Fatal *Vibrio vulnificus* infection associated with eating raw oysters, New Caledonia. *Emerging Infectious Diseases*, 17(1), 136-137. <https://doi.org/10.3201/eid1701.100603>
- Engel, M. F., Muijsken, M. A., Mooi-Kokenberg, E., Kuijper, E. J., & van Westerloo, D. J. (2016). *Vibrio cholerae* non-O1 bacteraemia: description of three cases in the Netherlands and a literature review. *Eurosurveillance*, 21(15), 30197. <https://doi.org/10.2807/1560-7917.ES.2016.21.15.30197>
- Friesema, I. H., Slegers-Fitz-James, I. A., Wit, B., & Franz, E. (2022). Surveillance and characteristics of food-borne outbreaks in the Netherlands, 2006 to 2019. *Eurosurveillance*, 27(3), 2100071. <https://doi.org/10.2807/1560-7917.ES.2022.27.3.2100071>
- García Cuevas, M., Collazos González, J., Martínez Gutiérrez, E., & Mayo Suárez, J. (1998). [*Vibrio vulnificus* septicemia in Spain]. *Anales de Medicina Interna*, 15(9), 485-486.
- Haeghebaert, S., Le Querrec, F., Vaillant, V., Delarocque Astagneau, E., & Bouvet, P. (2001). Les toxi-infections alimentaires collectives en France en 1998. *Bulletin Epidémiologique Hebdomadaire*, 65-70. <https://www.santepubliquefrance.fr/maladies-et-traumatismes/maladies-infectieuses-d-origine-alimentaire/toxi-infections-alimentaires-collectives/documents/article/les-toxi-infections-alimentaires-collectives-en-france-en-1998>
- Hoeffler, F., Pouget-Abadie, X., Roncato-Saberan, M., Lemarie, R., Takoudju, E. M., Raffi, F., Corvec, S., Le Bras, M., Cazanave, C., Lehours, P., Guimard, T., & Allix-Beguec, C. (2022). Clinical and epidemiologic characteristics and therapeutic management of patients with *Vibrio* infections, Bay of Biscay, France, 2001-2019. *Emerging Infectious Diseases*, 28(12), 2367-2373. <https://doi.org/10.3201/eid2812.220748>
- Lemoine, T., Germanetto, P., & Giraud, P. (1997). Toxi-infection alimentaire collective à *Vibrio parahaemolyticus*. *Bulletin Epidémiologique Hebdomadaire*, 10, 1-4. [https://beh.santepubliquefrance.fr/beh/1999/9910/beh\\_10\\_1999.pdf](https://beh.santepubliquefrance.fr/beh/1999/9910/beh_10_1999.pdf)
- Lozano-Leon, A., Torres, J., Osorio, C. R., & Martinez-Urtaza, J. (2003). Identification of *tdh*-positive *Vibrio parahaemolyticus* from an outbreak associated with raw oyster consumption in Spain. *FEMS Microbiology Letters*, 226(2), 281-284. [https://doi.org/10.1016/s0378-1097\(03\)00604-9](https://doi.org/10.1016/s0378-1097(03)00604-9)
- Lukinmaa, S., Mattila, K., Lehtinen, V., Hakkinen, M., Koskela, M., & Siitonen, A. (2006). Territorial waters of the Baltic Sea as a source of infections caused by *Vibrio cholerae* non-O1, non-O139: report of 3 hospitalized cases. *Diagnostic Microbiology and Infectious Disease*, 54(1), 1-6. <https://doi.org/10.1016/j.diagmicrobio.2005.06.020>
- Marek, A., Inkster, T., Anderson, E., Jenkins, C., Boyd, J., Kerr, S., & Cowden, J. (2013). Non-toxigenic *Vibrio cholerae* bacteraemia: case report and review of the literature. *Journal of Medical Microbiology*, 62(9), 1357-1359. <https://doi.org/10.1099/jmm.0.060400-0>
- Marinello, S., Marini, G., Parisi, G., Gottardello, L., Rossi, L., Besutti, V., & Cattelan, A. M. (2017). *Vibrio cholerae* non-O1, non-O139 bacteraemia associated with pneumonia, Italy 2016. *Infection*, 45, 237-240. <https://doi.org/10.1007/s15010-016-0961-4>
- Martinez-Urtaza, J., Powell, A., Jansa, J., Rey, J. L. C., Montero, O.P., Campello, M.G., Lopez, M. J. Z., Pousa, A., Valles, M. J. F., Trinanes, J., Hervio-Heath, D., Keay, W., Bayley, A., Hartnell, R., & Baker-Austin C. (2016). Epidemiological investigation of a foodborne outbreak in Spain associated with US West Coast genotypes of *Vibrio parahaemolyticus*. *Springerplus*, 5, 8. <https://doi.org/10.1186/s40064-016-1728-1>
- Martinez-Urtaza, J., Simental, L., Velasco, D., DePaola, A., Ishibashi, M., Nakaguchi, Y., Nishibuchi, M., Carrera-Flores, D., Rey-Alvarez, C., & Pousa A. (2005). Pandemic *Vibrio parahaemolyticus* O3:K6, Europe. *Emerging Infectious Diseases*, 11, 1319-1320. <https://doi.org/10.3201/eid1108.050322>
- Molero, X., Bartolome, R. M., Vinuesa, T., Guarner, L., Accarino, A., Casellas, F., & Garcia R. (1989). Acute *Vibrio parahaemolyticus* gastroenteritis in Spain – report of 8 cases. *Medicina Clinica*, 92(1), 1-4
- Ottaviani, D., Leoni, F., Rocchegiani, E., Canonico, C., Potenziani, S., Santarelli, S., Masini, L., Scuota, S., & Carraturo A. (2010). *Vibrio parahaemolyticus*-associated gastroenteritis in Italy: persistent occurrence of O3:K6 pandemic clone and emergence of O1:KUT serotype. *Diagnostic Microbiology and Infectious Disease*, 66(4), 452-455. <https://doi.org/10.1016/j.diagmicrobio.2009.11.015>
- Ottaviani, D., Leoni, F., Rocchegiani, E., Santarelli, S., Canonico, C., Masini, L., DiTrani, V., & Carraturo, A. (2008). First clinical report of pandemic *Vibrio parahaemolyticus* O3:K6 infection in Italy. *Journal of Clinical Microbiology*, 46(6), 2144-2145. <https://doi.org/10.1128/jcm.00683-08>

## Public health aspects of *Vibrio* spp. related to the consumption of seafood in the EU

- Ottaviani, D., Leoni, F., Rocchegiani, E., Santarelli, S., Masini, L., Di Trani, V., Canonico, C., Pianetti, A., Tega L., & Carraturo, A. (2009). Prevalence and virulence properties of non-O1 non-O139 *Vibrio cholerae* strains from seafood and clinical samples collected in Italy. *International Journal of Food Microbiology*, 132(1), 47-53. <https://doi.org/10.1016/j.ijfoodmicro.2009.03.014>
- Petsaris, O., Noursbaum, J. B., Quilici, M. L., Le Coadou, G., Payan, C., & Abalain, M. L. (2010). Non-O1, non-O139 *Vibrio cholerae* bacteraemia in a cirrhotic patient. *Journal of Medical Microbiology*, 59(10), 1260-1262. <https://doi.org/10.1099/jmm.0.021014-0>
- Sala, M.R., Arias, C., Dominguez, A., Bartolome R., & Muntada J. M. (2009). Foodborne outbreak of gastroenteritis due to Norovirus and *Vibrio parahaemolyticus*. *Epidemiology and Infection*, 137(5), 626-629. <https://doi.org/10.1017/s0950268808001040>
