# Supplementary material for: Public health aspects of Vibrio spp. related to the consumption of seafood in the EU
Source: PubMed Central journal article supplement (PMC11263920; doi:10.2903/j.efsa.2024.8896), 2024-07-23
Supplement: EFS2-22-e8896-s002.pdf [file EFS2-22-e8896-s002.pdf]

Annex to: EFSA's BIOHAZ Panel Scientific opinion "Public health aspects of *Vibrio* spp. related to the consumption of seafood in the EU". doi:10.2903/j.efsa.2024.8896

© European Food Safety Authority, 2024

## Annex G – *Vibrio parahaemolyticus* outbreak associated with an increase of seawater temperature (Pacific Northwest, 1997)

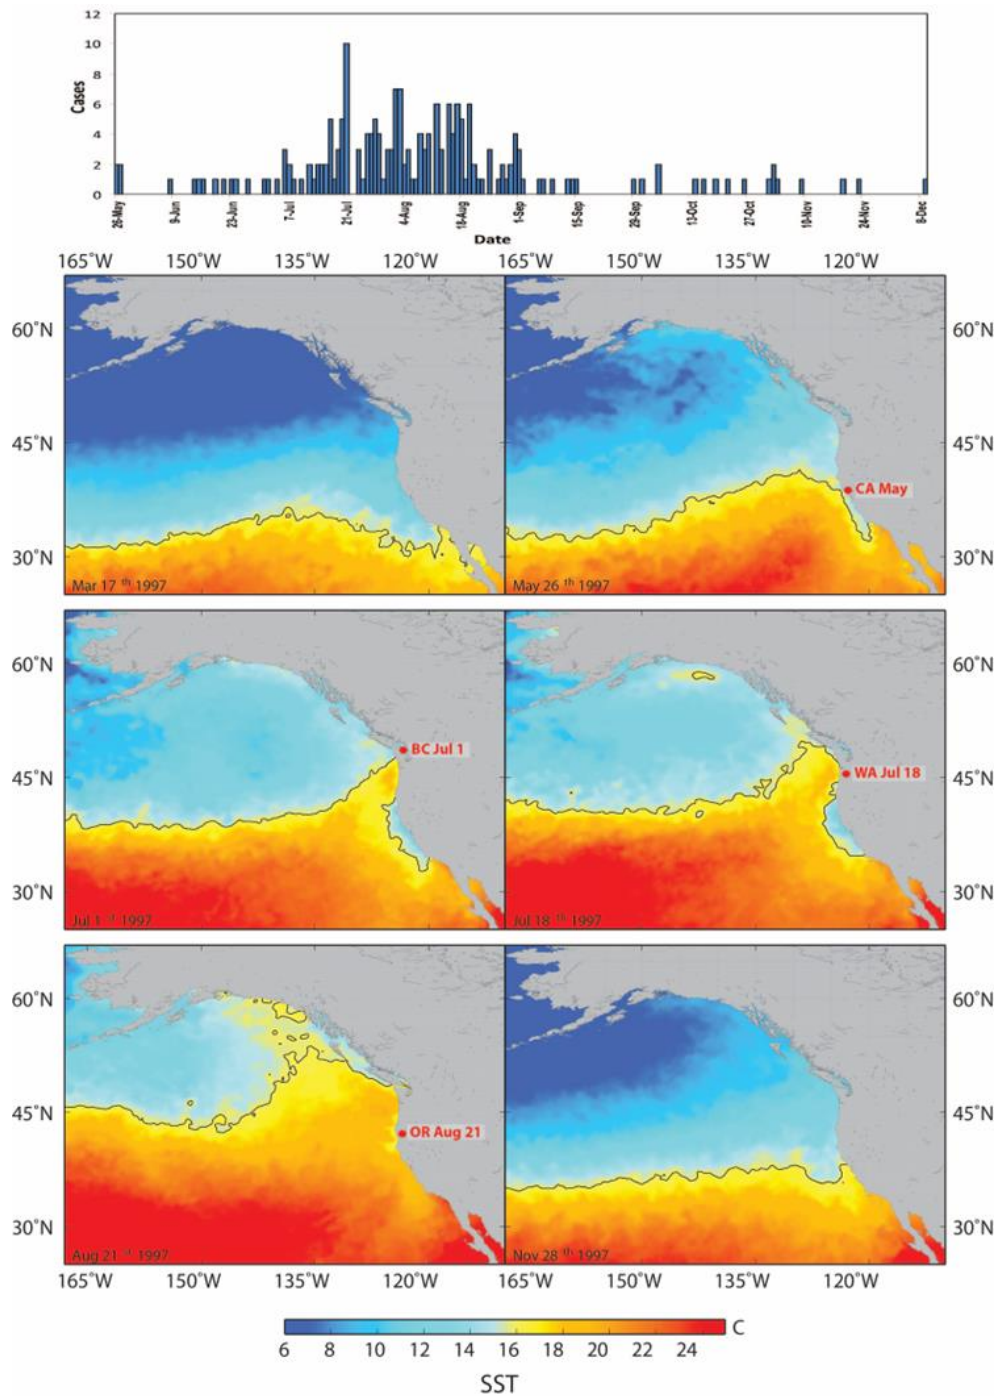

**Figure G.1:** Temporal and spatial correspondence between the epicurve (top, based on <https://www.cdc.gov/mmwr/preview/index98.html>) and sea surface temperature data from the Pacific Northwest region of USA (bottom), Early summer to Autumn, 1997.
