# Supplementary material for: Public health aspects of Vibrio spp. related to the consumption of seafood in the EU
Source: PubMed Central journal article supplement (PMC11263920; doi:10.2903/j.efsa.2024.8896), 2024-07-23
Supplement: EFS2-22-e8896-s003.pdf [file EFS2-22-e8896-s003.pdf]

Annex to: EFSA's BIOHAZ Panel Scientific opinion "Public health aspects of *Vibrio* spp. related to the consumption of seafood in the EU". doi:10.2903/j.efsa.2024.8896

© European Food Safety Authority, 2024

## Annex I – Characterisation of relevant (quantitative) microbial risk assessment of *Vibrio* spp. in various types of seafood

**Table I.1:** Characterisation of selected (quantitative) microbial risk assessment (QMRA) of *Vibrio* spp. in various types of seafood.

| Reference               | Title                                                                                                                                                                                             |
|-------------------------|---------------------------------------------------------------------------------------------------------------------------------------------------------------------------------------------------|
| FAO and WHO (2005a)     | Risk assessment of cholerae <i>Vibrio cholerae</i> O1 and O139 in warm-water shrimp in international trade                                                                                        |
| US FDA (2005)           | Quantitative risk assessment on the public health impact of pathogenic <i>Vibrio parahaemolyticus</i> in raw oysters (FDA-VPRA model)                                                             |
| FAO and WHO (2005b)     | Risk assessment of <i>Vibrio vulnificus</i> in raw oysters                                                                                                                                        |
| Anses (2012)            | Assessment of the risk associated with <i>Vibrio parahaemolyticus</i> and live shellfish consumption (mussels and oysters)                                                                        |
| BfR (2022)              | Bacterial foodborne <i>Vibrio</i> infections: health risk assessment of the occurrence of <i>Vibrio</i> spp. (non-cholera vibrios) in food                                                        |
| FAO and WHO (2011)      | Risk assessment of <i>Vibrio parahaemolyticus</i> in seafood                                                                                                                                      |
| Phillips et al. (2007)  | An evaluation of the use of remotely sensed parameters for prediction of incidence and risk associated with <i>Vibrio parahaemolyticus</i> in Gulf Coast oysters ( <i>Crassostrea virginica</i> ) |
| Yamamoto et al. (2008)  | Quantitative modelling for risk assessment of <i>Vibrio parahaemolyticus</i> in bloody clams in southern Thailand                                                                                 |
| Iwahori et al. (2010)   | Quantitative risk assessment of <i>Vibrio parahaemolyticus</i> in finfish: A model of raw horse mackerel consumption in Japan                                                                     |
| Sani et al. (2013)      | The risk assessment of <i>Vibrio parahaemolyticus</i> in cooked black tiger shrimps ( <i>Penaeus monodon</i> ) in Malaysia                                                                        |
| Sobrinho et al. (2014)  | A quantitative risk assessment model for <i>Vibrio parahaemolyticus</i> in raw oysters in Sao Paulo State, Brazil                                                                                 |
| Malcolm et al. (2016)   | Microbial risk assessment of <i>Vibrio parahaemolyticus</i> in bloody clams in Malaysia: A preliminary model from retail to consumption                                                           |
| Huang et al. (2018)     | The risk of <i>Vibrio parahaemolyticus</i> infections associated with consumption of raw oysters as affected by processing and distribution conditions in Taiwan                                  |
| Ndraha and Hsiao (2019) | The risk assessment of <i>Vibrio parahaemolyticus</i> in raw oysters in Taiwan under the seasonal variations, time horizons, and climate scenarios                                                |
| Tan et al. (2019)       | Preliminary quantitative microbial risk assessment of pathogenic <i>Vibrio parahaemolyticus</i> in short mackerel in Malaysia                                                                     |

|                          |                                                                                                                                                                                     |
|--------------------------|-------------------------------------------------------------------------------------------------------------------------------------------------------------------------------------|
| Kang et al. (2021)       | Quantitative microbial risk assessment of <i>Vibrio parahaemolyticus</i> foodborne illness of sea squirt ( <i>Halocynthia roretzi</i> ) in South Korea                              |
| Oh et al. (2021)         | Risk assessment of vibriosis by <i>Vibrio cholerae</i> and <i>Vibrio vulnificus</i> in whip-arm octopus consumption in South Korea                                                  |
| Ding et al. (2022)       | Quantitative risk assessment of <i>Vibrio parahaemolyticus</i> in shellfish from retail to consumption in coastal cities of Eastern China                                           |
| Neetoo et al. (2022)     | Prevalence, genomic characterization, and risk assessment of human pathogenic <i>Vibrio</i> species in seafood                                                                      |
| Takoundjou et al. (2022) | Quantitative risk assessment of <i>Vibrio parahaemolyticus</i> toxin infection associated with the consumption of roasted shrimp ( <i>Penaeus monodon</i> )                         |
| Xu et al. (2023)         | Risk reduction assessment of <i>Vibrio parahaemolyticus</i> on shrimp by a Chinese eating habit                                                                                     |
| Ong et al. (2023)        | Quantitative risk evaluation of antimicrobial-resistant <i>Vibrio parahaemolyticus</i> isolated from farmed grey mullets in Singapore                                               |
| Ndraha et al. (2023)     | Modeling the risk of <i>Vibrio parahaemolyticus</i> in oysters in Taiwan by considering seasonal variations, time periods, climate change scenarios, and post-harvest interventions |

| Reference           | Scope (part of food chain)                                                           | Geographic scope                                                                                                                                                   | Approach (type of models, variability/uncertainty)                                                                                                    | Hazard(s) and origin of occurrence data     | Environmental parameter used                                                                        | Food(s) and consumption data                                                                                                        | Health endpoint (and population)                                            | DR-model                                                                                                         | Exposure assessment models (and predictive microbiology models)                                                                                                                                                      | Prevention or control measures tested                                                                                                                       | Risk units                                                    |
|---------------------|--------------------------------------------------------------------------------------|--------------------------------------------------------------------------------------------------------------------------------------------------------------------|-------------------------------------------------------------------------------------------------------------------------------------------------------|---------------------------------------------|-----------------------------------------------------------------------------------------------------|-------------------------------------------------------------------------------------------------------------------------------------|-----------------------------------------------------------------------------|------------------------------------------------------------------------------------------------------------------|----------------------------------------------------------------------------------------------------------------------------------------------------------------------------------------------------------------------|-------------------------------------------------------------------------------------------------------------------------------------------------------------|---------------------------------------------------------------|
| FAO and WHO (2005a) | Harvest to consumption; QMRA model only from the point of entry to consumption       | Global; warm-water shrimp produced and processed for the export market; the risk associated with the consumption of imported shrimp in several importing countries | Qual and quant; mean exposure and risk were evaluated analytically and within Monte Carlo simulation of the effect of uncertainty (prevalence and DR) | Vc O1 and O139                              | None, concentration at port of entry estimated based on prevalence, assuming a Poisson distribution | Warm water shrimp; consumption calculated from production volumes and population size, with a mean serving size of 275 g            | Gastro-intestinal illness; general population                               | Threshold model (qual and semi-quant approach); approximate Beta-Poisson model using data from volunteer studies | Spreadsheet tool (semi-quant); QMRA model: prevalence at the point of entry used to estimate levels assuming a Poisson distribution; no predictive models used but present information on reductions and increases   | None, but uncooked (10%) and cooked shrimps (90%) evaluated                                                                                                 | Cases per time period, and cases per 10 <sup>9</sup> servings |
| US FDA (2005)       | Product pathway: harvest, post-harvest handling, processing, storage and consumption | USA, different regions and seasons                                                                                                                                 | Quant simulation model and what-if scenarios, factors affecting risk and control measures; uncertainty analysis                                       | Pathogenic Vp; different regions in the USA | Occurrence data based on the water T model and the ratio of pathogenic Vp                           | Raw oysters; national, number of servings based on production volume, number of oysters consumed per meal, and the weight of edible | Illness (GE or septicaemia); healthy individuals or impaired immune systems | DR model developed based on human feeding studies and anchored to epidemiological data                           | Three modules (harvest, post-harvest, consumption); growth model (> 10°C), during cooling or intertidal harvest; primary Gompertz and three-phase loglinear, and secondary square root a <sub>w</sub> and T based on | Presence at harvest (sea water T main factor) and post-harvest growth (t-T at different steps) storage; post-harvest treatments; microbiological standards; | Probability and severity of illness per serving or year       |

Public health aspects of *Vibrio* spp. related to the consumption of seafood in the EU

|                     |                                                                      |                                  |                                                                     |                                                                                                 |                                                                                                                                               |                                                                                                                           |                                           |                                                                                                                                           |                                                                                                                                                                                                                       |                                                                                                                                                                      |                                                    |
|---------------------|----------------------------------------------------------------------|----------------------------------|---------------------------------------------------------------------|-------------------------------------------------------------------------------------------------|-----------------------------------------------------------------------------------------------------------------------------------------------|---------------------------------------------------------------------------------------------------------------------------|-------------------------------------------|-------------------------------------------------------------------------------------------------------------------------------------------|-----------------------------------------------------------------------------------------------------------------------------------------------------------------------------------------------------------------------|----------------------------------------------------------------------------------------------------------------------------------------------------------------------|----------------------------------------------------|
|                     |                                                                      |                                  |                                                                     |                                                                                                 |                                                                                                                                               | oyster parts                                                                                                              |                                           |                                                                                                                                           | literature data; inactivation models or estimates from the literature                                                                                                                                                 | intertidal harvest                                                                                                                                                   |                                                    |
| FAO and WHO (2005b) | Harvest to consumption; evaluate if Vp models could be adapted to Vv | Gulf Coast of USA                | The Monte Carlo simulation model addressing variability/uncertainty | Vv; Gulf Coast of USA                                                                           | Relationship between water T and levels                                                                                                       | Raw oysters; USA data, number of oysters per serving and weight per oyster                                                | Septicaemia; susceptible population       | Beta-Poisson model developed by fitting estimated consumption; exposure with the number of reported cases                                 | Modules harvest, postharvest-consumption, growth after harvest and during cooling, and storage (three-phase log-linear model); die-off during storage                                                                 | Different process target levels (3, 30 or 300 Vv per g) which could potentially be achieved by different mitigation strategies (mild heat, freezing, HPP, and icing) | Mean risk per serving and mean number of illnesses |
| Anses (2012)        | Harvest to consumption                                               | France                           | Monte Carlo simulation model addressing variability/uncertainty     | Pathogenic Vp (and info about other non-cholerae vibrios); seven different regions based on SST | Relationship (from a US-FDA study) between seawater T (French data) and Vp levels, pathogenic Vp estimated by proportion from the US-FDA data | Oysters and mussels; consumption (frequency and meal size) over the year from production data and French consumer surveys | Gastroenteritis in the general population | Beta-Poisson model from FDA-VPRA; adjusted beta-parameter was used and uncertainty was estimated by parametric resampling (Bootstrapping) | Exposure estimated using SST from different regions, the proportion of pathogenic strains, and growth or inactivation depending on T after harvest to direct selling; predictive model Fernandez-Piquer et al. (2011) | The impact of season, increase of SST (2°C) and storage time (12 hours)                                                                                              | Number of cases in France                          |
| BfR (2022)          | Primary production to                                                | Seafood consumed and/or oysters; | Qual, uncertainties: quant occurrence data, proportion              | <i>Vibrio</i> spp. including Va, Vm, but focus                                                  | Not applicable                                                                                                                                | Fish, fish products, seafood, oysters,                                                                                    | Illness (diarrhoea and other)             | Not applied                                                                                                                               | Not applied                                                                                                                                                                                                           | Cooking to internal T of 70°C assumed to                                                                                                                             | Cases (no cases reported),                         |

Public health aspects of *Vibrio* spp. related to the consumption of seafood in the EU

consumption; mussels produced in Germany; eaten raw, and underreporting; is on non-cholerae vibrios; data relevant for consumption in Germany; and mussels; German consumption data; health endpoints); general population and risk groups considered; eliminate all vibrios; results of assessment presented in a BfR risk profile table

|                        |                                                                                                                                   |                                                                                                 |                  |                                                                                                           |                                                                                                                                           |                                                                                                                      |                        |                     |                                                                                                                                                                                                        |                                                                                                                                                                                                                          |                                                                                                                                                    |
|------------------------|-----------------------------------------------------------------------------------------------------------------------------------|-------------------------------------------------------------------------------------------------|------------------|-----------------------------------------------------------------------------------------------------------|-------------------------------------------------------------------------------------------------------------------------------------------|----------------------------------------------------------------------------------------------------------------------|------------------------|---------------------|--------------------------------------------------------------------------------------------------------------------------------------------------------------------------------------------------------|--------------------------------------------------------------------------------------------------------------------------------------------------------------------------------------------------------------------------|----------------------------------------------------------------------------------------------------------------------------------------------------|
| FAO and WHO (2011)     | Adoption of the QMRA model developed in the USA (FDA-VPRA) to other countries and products (when data missing, USA data was used) | Australia, Canada, Japan and New Zealand (raw oysters); Thailand (bloody clam); Japan (finfish) | Same as FDA-VPRA | Vp; oysters: Australia, Canada, Japan New Zealand, and the USA; bloody clams (Thailand); mackerel (Japan) | For oysters, water T from relevant areas and USA quant relationship; bloody clams and mackerel, small surveys not environmental parameter | Raw oysters; bloody clam ( <i>Anadara granosa</i> ); raw horse mackerel (finfish); local data combined with USA data | GE; general population | Same as in FDA-VPRA | Modular models, different foods did not include all stages, same models as in FDA-VPRA, growth rate in bloody clams estimated from counts harvest and retail, other foods used for oyster growth rates | Target levels (oysters), mackerel (washing or no washing at the port; transportation in clean or contaminated water; washing or no washing of visceral cavity during the preparation; and various combinations of these) | Number of illnesses per year (oysters and mackerel); cases per 1,000 persons and year (bloody clams) Probability of illness per serving (mackerel) |
| Phillips et al. (2007) | Harvest to consumption but the scope of the study is the remote sensing of parameters to predict                                  | National, Gulf coast of the USA                                                                 | FDA-VPRA         | Vp; remote sensing data of sea water                                                                      | T, turbidity, chlorophyll to predict Vp in oysters                                                                                        | Raw oysters; same as FDA-VPRA                                                                                        | GE; general population | None                | FDA-VPRA                                                                                                                                                                                               | None                                                                                                                                                                                                                     | Vp per g, colour maps                                                                                                                              |

Public health aspects of *Vibrio* spp. related to the consumption of seafood in the EU

| <i>Vibrio</i> levels   |                        |                    |                                                                       |                                                                                                                                              |                              |                                                     |                        |                                                                                         |                                                                                                                                                                                                                                                           |                                                                                                                           |                                                                        |
|------------------------|------------------------|--------------------|-----------------------------------------------------------------------|----------------------------------------------------------------------------------------------------------------------------------------------|------------------------------|-----------------------------------------------------|------------------------|-----------------------------------------------------------------------------------------|-----------------------------------------------------------------------------------------------------------------------------------------------------------------------------------------------------------------------------------------------------------|---------------------------------------------------------------------------------------------------------------------------|------------------------------------------------------------------------|
| Yamamoto et al. (2008) | Harvest to consumption | National, Thailand | Monte Carlo simulation addressing mostly uncertainty of the mean risk | Pathogenic Vp; occurrence from samples in a small survey, assuming lognormal distribution for concentration and Poisson for pathogenic cells | None                         | Bloody clams; interview of local people             | GE; general population | Beta-Poisson model (FDA-VPRA)                                                           | Initial occurrence at harvest, growth up to retail and up to home, cooking, consumption; growth rate estimated from survey levels at harvest and retail, inactivation all or none survive, proportion cooking from beta distribution using a small survey | Effect of cooking                                                                                                         | Mean number of illnesses per person per year                           |
| Iwahori et al. (2010)  | Harvest to consumption | Japan              | Monte Carlo simulation simulating mostly variability                  | Vp; Japan                                                                                                                                    | None; based on reported data | Raw horse mackerel; survey data, Japan              | GE; general population | Beta-Poisson model, (FDA-VPRA) and a new model with parameters from new feeding studies | Two to three modules; removal-log reductions and growth models (exponential, no lag), secondary from the literature and experiments                                                                                                                       | Growth at all stages, washing the fish, storage water, and bacterial transfer from the fish to fillets during preparation | Probability of illness per serving                                     |
| Sani et al. (2013)     | Retail to consumption  | Malaysia           | Monte Carlo simulation simulating mostly variability                  | Pathogenic Vp; from a previous study in the same area                                                                                        | None                         | Raw frozen black tiger shrimp; national survey data | GE; general population | Beta-Poisson (FDA-VPRA)                                                                 | Retail, thawing, cooking, and consumption based on the literature and assumptions                                                                                                                                                                         | Cooking and t-T control                                                                                                   | Number of cases per year, number of cases per 100,000 persons per year |

Public health aspects of *Vibrio* spp. related to the consumption of seafood in the EU

|                         |                               |                    |                                                      |                                                                 |                                           |                                                             |                        |                               |                                                                                                                                                                                         |                                                                            |                                                               |
|-------------------------|-------------------------------|--------------------|------------------------------------------------------|-----------------------------------------------------------------|-------------------------------------------|-------------------------------------------------------------|------------------------|-------------------------------|-----------------------------------------------------------------------------------------------------------------------------------------------------------------------------------------|----------------------------------------------------------------------------|---------------------------------------------------------------|
| Sobrinho et al. (2014)  | Harvest to consumption        | National, Brazil   | Monte Carlo simulation simulating mostly variability | Pathogenic Vp; sea water T and Vp levels in oysters from Brazil | Sea water T using own regression model    | Raw oysters; estimated based on Brazilian data              | GE; general population | Beta-Poisson model (FDA-VPRA) | Three modules: harvest, post-harvest, and consumption; growth (FDA-VPRA), reduction due to depuration (this study), inactivation during storage (assumed based on the literature)       | t-T, depuration (ozone and UV)                                             | Probability of illness per serving                            |
| Malcolm et al. (2016)   | Retail to consumption         | National, Malaysia | Monte Carlo simulation model addressing variability  | Pathogenic Vp; based on a small national study (MPN/g)          | None                                      | Bloody clams; national data                                 | GE; general population | Beta-Poisson model (FDA-VPRA) | Two modules: retail and consumption; growth from the broth model (FDA-VPRA) adjusted to oysters; heat inactivation model log reduction from literature data                             | Impact initial occurrence, and t-T, two types of markets                   | Probability of illness per serving, number of cases per year  |
| Huang et al. (2018)     | Harvest to consumption        | National, Taiwan   | Monte Carlo simulation addressing variability        | Pathogenic Vp; based on a study in Taiwan                       | None                                      | Raw oysters; the literature and interviews; national survey | GE; general population | Beta-Poisson model (FDA-VPRA) | Three modules: harvest, processing/distribution, and consumption; secondary growth (> 12°C) (FDA-VPRA) and inactivation (< 12°C) secondary square root model developed from experiments | Impact of initial occurrence, t and T during processing and transportation | Probability of illness per serving, cases per 100,000 persons |
| Ndraha and Hsiao (2019) | Growing, harvest, consumption | National, Taiwan   | Monte Carlo simulation addressing mostly variability | Pathogenic Vp; modelled using climate                           | Water T, and salinity in the US-FDA model | Raw oysters; national data from                             | GE; general population | Beta-Poisson model (FDA-VPRA) | Four modules: post-harvest, cleaning and packaging, transport, and                                                                                                                      | Impact of seasons, climate, refrigeration, depuration,                     | Probability of illness per serving                            |

|                    |                              |                        |                                                      | factors in Taiwan                                                                                                                                                                                            |      | Huang et al. (2018)                                                       |                        |                                                                        | consumption; growth rate from FDA-VPRA and inactivation data from Huang et al. (2018)                                                                                                             | freezing, thermal treatment, heat shock, and irradiation |                                                                           |
|--------------------|------------------------------|------------------------|------------------------------------------------------|--------------------------------------------------------------------------------------------------------------------------------------------------------------------------------------------------------------|------|---------------------------------------------------------------------------|------------------------|------------------------------------------------------------------------|---------------------------------------------------------------------------------------------------------------------------------------------------------------------------------------------------|----------------------------------------------------------|---------------------------------------------------------------------------|
| Tan et al. (2019)  | Retail to consumption        | National, Malaysia     | Monte Carlo simulation addressing mostly variability | Pathogenic Vp; occurrence data (beta-distribution) from a previous study and levels in whole fish (estimated from levels in different parts of the fish with a modified equation from Iwahori et al. (2010)) | None | Short mackerel; consumption from national statistics                      | GE; general population | Beta-Poisson model (FDA-VPRA)                                          | Growth during storage and transport from FDA-VPRA model, reduction by gilling and gutting, and washing, cooking inactivation from experimental study                                              | Cooking, washing                                         | Number of cases per year, number of cases per 100,000 population per year |
| Kang et al. (2021) | Market/retail to consumption | National (South Korea) | Monte Carlo simulation addressing variability        | Vp survey data from market in South Korea                                                                                                                                                                    | None | Sea squirt, an edible ascidian (sea pineapple); national consumption data | GE; general population | Beta-Poisson model, same as in Iwahori et al. (2010) based on FDA-VPRA | Stochastic models describing growth during storage and transport; t/T from an interview with a market employee, and home storage from another Korean study; predictive growth models developed in | None                                                     | Probability of illness per person and day                                 |



|                          |                               |                       |                                                                           |                                                          |      |                                                                                  |                                     |                                                         |                                                                                                                                                                          |                                      |                                                |
|--------------------------|-------------------------------|-----------------------|---------------------------------------------------------------------------|----------------------------------------------------------|------|----------------------------------------------------------------------------------|-------------------------------------|---------------------------------------------------------|--------------------------------------------------------------------------------------------------------------------------------------------------------------------------|--------------------------------------|------------------------------------------------|
|                          |                               |                       |                                                                           |                                                          |      |                                                                                  |                                     |                                                         | food matrix, and primary Baranyi and secondary square root models                                                                                                        |                                      |                                                |
| Oh et al. (2021)         | Harvest to consumption        | National, South Korea | Monte Carlo simulation addressing variability                             | Vc and Vv; estimated from market samples                 | None | Raw whip-arm octopus; national survey data                                       | See respective DR model             | Beta Poisson model with parameters from WHO-FAO reports | Occurrence, growth, and consumption; developed polynomial growth and lag phase models                                                                                    | None                                 | Probability of illness per person per day      |
| Ding et al. (2022)       | Retail to cooking in the home | China                 | Monte Carlo simulation addressing variability                             | Pathogenic Vp; survey, MPN data using PCR                | None | Oysters, clams, mussels, and scallop; national dietary survey                    | GE; general population              | Beta-Poisson                                            | Four modules: point of purchase, storage after purchase, preparation stage, and consumption stage                                                                        | Initial levels, storage conditions   | Probability of illness per person per year     |
| Neetoo et al. (2022)     | Occurrence to risk            | National, Mauritius   | Risk estimated from occurrence data using the semi-quant tool Risk Ranger | <i>Vibrio</i> spp.; sampling of seafood around Mauritius | None | Wild and farmed finfish and shellfish (oysters and sea urchins); consumer survey | Illness; immunocompetent population | No model                                                | Probability of contamination of raw product and effect of processing control, and preparation (Risk Ranger)                                                              | None                                 | Risk score                                     |
| Takoundjou et al. (2022) | Post-harvest to consumption   | National, Cameroon    | Monte Carlo simulation addressing mostly variability                      | Pathogenic Vp; occurrence based on a small study         | None | Roasted shrimps; survey on handling and consumption patterns                     | GE; general population              | Beta-Poisson model with adjustment parameter (FDA-VPRA) | Cooking, storage, and consumption; growth: experimental data in shrimps fitted to Baranyi and Roberts model to estimate growth rate and lag; roasting model: experiments | Different roasting/cooking protocols | Cases per million servings, and cases per year |

|                      |                                               |                     |                                               |                                                                                                                                 |                                                                                                                                                                                  |                                                                    |                        |                               |                                                                                                                                                    | fitted to a regression model                                                                                                                                                                                                    |                                                                                                                      |
|----------------------|-----------------------------------------------|---------------------|-----------------------------------------------|---------------------------------------------------------------------------------------------------------------------------------|----------------------------------------------------------------------------------------------------------------------------------------------------------------------------------|--------------------------------------------------------------------|------------------------|-------------------------------|----------------------------------------------------------------------------------------------------------------------------------------------------|---------------------------------------------------------------------------------------------------------------------------------------------------------------------------------------------------------------------------------|----------------------------------------------------------------------------------------------------------------------|
| Xu et al. (2023)     | Market to consumption                         | National, China     | Monte Carlo simulation addressing variability | Pathogenic Vp; assumed range based on the literature                                                                            | None                                                                                                                                                                             | Shrimps; national Survey                                           | GE; general population | Beta-Poisson model (FDA-VPRA) | Initial level and reduction via different vinegars; reduction model fitted to experimental data                                                    | Mixing of shrimp with vinegars                                                                                                                                                                                                  | Probability of illness per serving                                                                                   |
| Ong et al. (2023)    | Farm to consumption and retail to consumption | National, Singapore | Monte Carlo simulation addressing variability | Antimicrobial resistant Vp; based on studies of fish from Singapore                                                             | None                                                                                                                                                                             | Farmed grey Mullet (finfish); national survey data                 | GE; general population | Beta-Poisson model (FDA-VPRA) | Stages after harvest or retail estimating growth and reduction due to cooking, washing; growth models from FDA-VPRA, reduction from the literature | Cooking and washing of fish cavity                                                                                                                                                                                              | Probability of illness per serving, cases per year                                                                   |
| Ndraha et al. (2023) | Harvest to consumption                        | National, Taiwan    | Monte Carlo simulation addressing variability | Pathogenic Vp; modelled using new model and Taiwanese environmental data and levels; proportion pathogenic based on survey data | Levels were simulated applying a new elastic net predictive model using a supervised machine learning approach employing over 20 local climatic factors with fitted coefficients | Oysters; national from the literature and oyster weight from study | GE                     | Beta-Poisson model (FDA-VPRA) | Growth and inactivation after harvest were modelled based on literature data as part of evaluating interventions                                   | Cooking, icing/refrigeration and T control and cleaning during several stages after harvest, depuration, HPP, salt levels, irradiation, and mild thermal shock; all these under different climate scenarios through effect on T | Probability of illness per serving, probability of illness per year; number of cases per 100,000 population and year |

| Reference               | Data gaps                                                                                                                                                                                                                                                                                                                                                                                                                                                                                                                                                                                                                                                                                                                                                                                                                        |
|-------------------------|----------------------------------------------------------------------------------------------------------------------------------------------------------------------------------------------------------------------------------------------------------------------------------------------------------------------------------------------------------------------------------------------------------------------------------------------------------------------------------------------------------------------------------------------------------------------------------------------------------------------------------------------------------------------------------------------------------------------------------------------------------------------------------------------------------------------------------|
| FAO and WHO (2005a)     | Quant occurrence data along the food chain; faecal; cross contamination during handling, and post-processes or cross-contamination data; consumption data                                                                                                                                                                                                                                                                                                                                                                                                                                                                                                                                                                                                                                                                        |
| US FDA (2005)           | Frequency of pathogenic Vp in water and shellfish; growth rates; impact of different harvest and post-harvest handlings and processes; consumption data; DR data; epidemiological data; impact of consumer handling                                                                                                                                                                                                                                                                                                                                                                                                                                                                                                                                                                                                              |
| FAO and WHO (2005b)     | Vv-T relationship; oyster species; DR; variation in Vv virulence and human susceptibility                                                                                                                                                                                                                                                                                                                                                                                                                                                                                                                                                                                                                                                                                                                                        |
| Anses (2012)            | National data for SST; relationship between SST and levels based on USA data; air T data based on the relationship with marine SST; post-harvest conditions expert opinion; consumption data; growth of pathogenic Vp; DR data; susceptibility in the French population                                                                                                                                                                                                                                                                                                                                                                                                                                                                                                                                                          |
| BfR (2022)              | Levels in food in Germany; consumer habits; epidemiological data                                                                                                                                                                                                                                                                                                                                                                                                                                                                                                                                                                                                                                                                                                                                                                 |
| FAO and WHO (2011)      | Epidemiological data; incidence and frequency of pathogenic Vp in water, finfish and shellfish; impact of factors on occurrence of pathogenic Vp in the environment, role of oyster physiology and immune status in Vp, DR model; growth rates of within different oyster species at Ts other than 26°C; growth rates in other shellfish and finfish at post-harvest handling and storage; rates of hydraulic flushing (water turnover) in shellfish harvest areas based on levels of freshwater flows; tidal changes, winds and depth of harvesting area, and how these factors may influence pathogenic Vp numbers; consumer handling of oysters; cross-contamination when finfish are prepared for raw consumption; improved global public health surveillance of Vp; knowledge of reporting systems in each country of study |
| Phillips et al. (2007)  |                                                                                                                                                                                                                                                                                                                                                                                                                                                                                                                                                                                                                                                                                                                                                                                                                                  |
| Yamamoto et al. (2008)  | Sensitivities of detection methods; limited occurrence data not covering season and regions, or distributions; proportion pathogenic strains; limited consumption and handling data; epidemiological data; cross-contamination; heat inactivation data; DR; growth rates of pathogenic strains                                                                                                                                                                                                                                                                                                                                                                                                                                                                                                                                   |
| Iwahori et al. (2010)   | Detailed data on initial densities; proportion of pathogenic strains; the uncertainty of the DR                                                                                                                                                                                                                                                                                                                                                                                                                                                                                                                                                                                                                                                                                                                                  |
| Sani et al. (2013)      | DR; occurrence data; food matrix effects; consumer practices                                                                                                                                                                                                                                                                                                                                                                                                                                                                                                                                                                                                                                                                                                                                                                     |
| Sobrinho et al. (2014)  | Factors affecting growth, e.g. competition, dynamics of environmental variables, maximum population density                                                                                                                                                                                                                                                                                                                                                                                                                                                                                                                                                                                                                                                                                                                      |
| Malcolm et al. (2016)   | National data; t-T data                                                                                                                                                                                                                                                                                                                                                                                                                                                                                                                                                                                                                                                                                                                                                                                                          |
| Huang et al. (2018)     | Impact of cross-contamination; epidemiological data; occurrence of virulent strains; impact of climate change                                                                                                                                                                                                                                                                                                                                                                                                                                                                                                                                                                                                                                                                                                                    |
| Ndraha and Hsiao (2019) |                                                                                                                                                                                                                                                                                                                                                                                                                                                                                                                                                                                                                                                                                                                                                                                                                                  |
| Tan et al. (2019)       | Harvest to retail data; storage Ts retail and transport; inactivation during storage; ingredients effect on growth; cross-contamination, effect of different heat treatments; DR model; susceptibility and virulence                                                                                                                                                                                                                                                                                                                                                                                                                                                                                                                                                                                                             |
| Kang et al. (2021)      | Not discussed                                                                                                                                                                                                                                                                                                                                                                                                                                                                                                                                                                                                                                                                                                                                                                                                                    |
| Oh et al. (2021)        |                                                                                                                                                                                                                                                                                                                                                                                                                                                                                                                                                                                                                                                                                                                                                                                                                                  |
| Ding et al. (2022)      | DR; storage conditions; growth model in product                                                                                                                                                                                                                                                                                                                                                                                                                                                                                                                                                                                                                                                                                                                                                                                  |

|                          |                                                                                                                                                                                                                  |
|--------------------------|------------------------------------------------------------------------------------------------------------------------------------------------------------------------------------------------------------------|
| Neetoo et al. (2022)     | Concentration data at time of consumption                                                                                                                                                                        |
| Takoundjou et al. (2022) | Limited growth data; initial concentration data; DR; proportion of pathogenic Vp                                                                                                                                 |
| Xu et al. (2023)         | Epidemiological data                                                                                                                                                                                             |
| Ong et al. (2023)        | Cross-contamination data; limited data for several of inputs; AMR sequence data                                                                                                                                  |
| Ndraha et al. (2023)     | Number of samples to model; monitoring data in oysters; improve climate effect by extending to other parameters than T; strains virulence; cross-contamination and handling practices; strains survival and VBNC |

Abbreviations:  $a_w$ , water activity; AMR, antimicrobial resistance; DR, dose response; FDA-VPRA, Risk assessment model of US-FDA (2005) titled “Quantitative Risk Assessment on the Public Health Impact of Pathogenic *Vibrio parahaemolyticus* in Raw Oysters”; GE, gastroenteritis; HPP, high pressure processing; MPN, most probable number; PCR, polymerase chain reaction; QMRA, quantitative microbiological risk assessment; qual, qualitative; quant, quantitative; SST, sea surface temperature; T, temperature; t/T, time-temperature; USA, the United States of America; UV, Ultraviolet; Va, *V. alginolyticus*; VBNC, viable but non-culturable; Vc, *Vibrio cholerae*; Vm, *V. metschnikovii*; Vp, *Vibrio parahaemolyticus*; Vv, *Vibrio vulnificus*.

## References

- ANSES (Agence nationale de sécurité sanitaire de l'alimentation, de l'environnement et du travail). (2012). *Évaluation du risque lié à Vibrio parahaemolyticus lors de la consommation de coquillages vivants*. Avis de l'Anses. Saisine n° 2010-SA-0301. <https://www.anses.fr/fr/system/files/BIORISK2010sa0301Ra.pdf>
- BfR (German Federal Institute for Risk Assessment). (2022). *Bacterial foodborne Vibrio infections: Health risk assessment of the occurrence of Vibrio spp. (non-cholera vibrios) in food*. BfR Opinion No 011/2022 of 2013 April 2022, 37 pp. In: BfR-Stellungnahmen. Bundesinst. für Risikobewertung. <http://www.bfr.bund.de/cm/2349/bacterial-foodborne-vibrio-infections-health-risk-assessment-of-the-occurrence-of-vibrio-spp-in-food.pdf>
- Ding, G. Y., Zhao, L. I., Xu, J., Cheng, J. Y., Cai, Y. Y., Du, H. H., Xiao, G. S., & Zhao, F. (2022). Quantitative risk assessment of *Vibrio parahaemolyticus* in shellfish from retail to consumption in coastal cities of eastern China. *Journal of Food Protection*, 85(9), 1320–1328. <https://doi.org/10.4315/jfp-21-238>
- FAO and WHO (Food and Agriculture Organization of the United Nations & World Health Organization). (2005a). Risk assessment of cholerae *Vibrio cholerae* 01 and 0139 in warm water shrimp for international trade: Interpretative summary and technical report. Microbiological risk assessment series 9. ISBN: 9241563125; 90 pp. <https://www.who.int/publications/i/item/9241563125>
- FAO and WHO (Food and Agriculture Organization of the United Nations & World Health Organization). (2005b). Risk assessment of *Vibrio vulnificus* in raw oysters: Interpretative summary and technical report. Microbiological risk assessment series 8. ISBN: 9241563109; 114 pp. <https://www.who.int/publications/i/item/9241563109>
- FAO and WHO (Food and Agriculture Organization of the United Nations & World Health Organization). (2011). Risk assessment of *Vibrio parahaemolyticus* in seafood. Interpretative summary and technical report. Microbiological risk assessment series 26. ISBN: 978-92-4-154817-5, 200 pp. <https://www.who.int/publications/i/item/9789241548175>
- Fernandez-Piquer, J., Bowman, J. P., Ross, T., & Tamplin, M. L. (2011). Predictive models for the effect of storage temperature on *Vibrio parahaemolyticus* viability and counts of total viable bacteria in Pacific oysters (*Crassostrea gigas*). *Applied and Environmental Microbiology*, 77(24), 8687–8695. <https://doi.org/10.1128/aem.05568-11>
- Huang, Y. S., Hwang, C. A., Huang, L. H., Wu, V. C. H., & Hsiao, H. I. (2018). The risk of *Vibrio parahaemolyticus* infections associated with consumption of raw oysters as affected by processing and distribution conditions in Taiwan. *Food Control*, 86, 101–109. <https://doi.org/10.1016/j.foodcont.2017.10.022>
- Iwahori, J., Yamamoto, A., Suzuki, H., Yamamoto, T., Tsutsui, T., Motoyama, K., Sawada, M., Matsushita, T., Hasegawa, A., Osaka, K., Toyofuku, H., & Kasuga, F. (2010). Quantitative risk assessment of *Vibrio parahaemolyticus* in finfish: A model of raw horse mackerel consumption in Japan. *Risk Analysis*, 30(12), 1817–1832. <https://doi.org/10.1111/j.1539-6924.2010.01444.x>
- Kang, J., Lee, Y., Choi, Y., Kim, S., Ha, J., Oh, H., Kim, Y., Seo, Y., Park, E., Rhee, M. S., Lee, H., & Yoon, Y. (2021). Quantitative microbial risk assessment of *Vibrio parahaemolyticus* foodborne illness of sea squirt (*Halocynthia roretzi*) in South Korea. *Fisheries and Aquatic Sciences*, 24(2), 78–88. <https://doi.org/10.47853/FAS.2021.e8>
- Malcolm, T. T. H., Cheah, Y. K., Radzi, C., Kantilal, H. K., Martinez-Urtaza, J., Nishibuchi, M., & Son, R. (2016). Microbial risk assessment of *Vibrio parahaemolyticus* in bloody clams in Malaysia: A preliminary model from retail to consumption. *Microbial Risk Analysis*, 4, 43–51. <https://doi.org/10.1016/j.mran.2016.07.002>
- Ndraha, N., & Hsiao, H. I. (2019). The risk assessment of *Vibrio parahaemolyticus* in raw oysters in Taiwan under the seasonal variations, time horizons, and climate scenarios. *Food Control*, 102, 188–196. <https://doi.org/10.1016/j.foodcont.2019.03.020>
- Ndraha, N., Lin, H. Y., Lin, H. J., & Hsiao, H. (2023). Modeling the risk of *Vibrio parahaemolyticus* in oysters in Taiwan by considering seasonal variations, time periods, climate change scenarios, and post-harvest interventions. *Microbial Risk Analysis*, 25(17), 100275. <https://doi.org/10.1016/j.mran.2023.100275>
- Neetoo, H., Reega, K., Manoga, Z. S., Nazurally, N., Bhoyroo, V., Allam, M., Jaufeerally-Fakim, Y., Ghoorah, A. W., Jaumdally, W., Hossen, A. M., Mayghun, F., Ismail, A., & Hosenally, M. (2022). Prevalence, genomic characterization, and risk assessment of human pathogenic *Vibrio* species in seafood. *Journal of Food Protection*, 85(11), 1553–1565. <https://doi.org/10.4315/jfp-22-064>
- Oh, H., Yoon, Y., Ha, J., Lee, J., Shin, I. I. S., Kim, Y.-M., Park, K.-S., & Kim, S. (2021). Risk assessment of vibriosis by *Vibrio cholerae* and *Vibrio vulnificus* in whip-arm octopus consumption in South Korea. *Fisheries and Aquatic Sciences*, 24, 207–218. <https://doi.org/10.47853/FAS.2021.e21>
- Ong, H. M. G., Zhong, Y., Hu, C. C., Ong, K. H., Khor, W. C., Schlundt, J., & Aung, K. T. (2023). Quantitative risk evaluation of antimicrobial-resistant *Vibrio parahaemolyticus* isolated from farmed Grey mullets in Singapore. *Pathogens*, 12(1), 93. <https://doi.org/10.3390/pathogens12010093>
- Phillips, A. M. B., DePaola, A., Bowers, J., Ladner, S., & Grimes, D. J. (2007). An evaluation of the use of remotely sensed parameters for prediction of incidence and risk associated with *Vibrio parahaemolyticus* in Gulf Coast oysters (*Crassostrea virginica*). *Journal of Food Protection*, 70(4), 879–884. <https://doi.org/10.4315/0362-028x-70.4.879>
- Sani, N. A., Ariyawansa, S., Babji, A. S., & Hashim, J. K. (2013). The risk assessment of *Vibrio parahaemolyticus* in cooked black tiger shrimps (*Penaeus monodon*) in Malaysia. *Food Control*, 31(2), 546–552. <https://doi.org/10.1016/j.foodcont.2012.10.018>
- Sobrinho, P. D. C., Destro, M. T., Franco, B., & Landgraf, M. (2014). A quantitative risk assessment model for *Vibrio parahaemolyticus* in raw oysters in Sao Paulo State, Brazil. *International Journal of Food Microbiology*, 180, 69–77. <https://doi.org/10.1016/j.ijfoodmicro.2014.04.008>
- Takoundjou, A. C. K., Bughe, R. N., Tong, A. N., Kamdem, S. L. S., & Essia-Ngang, J. J. (2022). Quantitative risk assessment of *Vibrio parahaemolyticus* toxigenic infection associated with the consumption of roasted shrimp (*Penaeus monodon*). *Journal of Food Quality*, 13, 5965151. <https://doi.org/10.1155/2022/5965151>

## Public health aspects of *Vibrio* spp. related to the consumption of seafood in the EU

- Tan, C. W., Malcolm, T. T. H., Premarathne, J., New, C. Y., Kuan, C. H., Thung, T. Y., Chang, W. S., Loo, Y. Y., Rukayadi, Y., Nakaguchi, Y., Nishibuchi, M., & Radu, S. (2019). Preliminary quantitative microbial risk assessment of pathogenic *Vibrio parahaemolyticus* in short mackerel in Malaysia. *Microbial Risk Analysis*, 12, 11–19. <https://doi.org/10.1016/j.mran.2019.02.001>
- US FDA (Food and Drug Administration). (2005). *Quantitative risk assessment on the public health impact of pathogenic Vibrio parahaemolyticus in raw oysters*. <https://www.fda.gov/food/cfsan-risk-safety-assessments/quantitative-risk-assessment-public-health-impact-pathogenic-vibrio-parahaemolyticus-raw-oysters>
- Xu, H., Liu, J., Yuan, M. Q., Tian, C. F., Lin, T., Liu, J. W., Osaris Caridad, O. C., Pan, Y. J., Zhao, Y., & Zhang, Z. H. (2023). Risk reduction assessment of *Vibrio parahaemolyticus* on shrimp by a Chinese eating habit. *International Journal of Environmental Research and Public Health*, 20(1), 317. <https://doi.org/10.3390/ijerph20010317>
- Yamamoto, A., Iwahori, J., Vuddhakul, V., Charernjiratragul, W., Vose, D., Osaka, K., Shigematsu, M., Toyofuku, H., Yamamoto, S., Nishibuchi, M., & Kasuga, F. (2008). Quantitative modeling for risk assessment of *Vibrio parahaemolyticus* in bloody clams in southern Thailand. *International Journal of Food Microbiology*, 124(1), 70–78. <https://doi.org/10.1016/j.ijfoodmicro.2008.02.021>
