# Supplementary material for: Public health aspects of Vibrio spp. related to the consumption of seafood in the EU
Source: PubMed Central journal article supplement (PMC11263920; doi:10.2903/j.efsa.2024.8896), 2024-07-23
Supplement: EFS2-22-e8896-s005.pdf [file EFS2-22-e8896-s005.pdf]

Annex to: EFSA’s BIOHAZ Panel Scientific opinion “Public health aspects of *Vibrio* spp. related to the consumption of seafood in the EU”.  
doi:10.2903/j.efsa.2024.8896

© European Food Safety Authority, 2024

## Annex D – Analytical methods for the detection and enumeration of potentially enteropathogenic *Vibrio* spp. in seafood

**Table D.1:** Overview of the analytical methods for the detection and enumeration of potentially enteropathogenic *Vibrio* spp. in seafood.

| Standardised methods for detection                                                                                                                                                                                                                                                                                                             |                                                                       |                            |                                                                                                                                                                                                                                                                               |                                                                                                                                                    |                                                                                                                                                                                                                                                                                                                                                                                                                                                                                                |                                                                                                                                                                                                                                                                    |
|------------------------------------------------------------------------------------------------------------------------------------------------------------------------------------------------------------------------------------------------------------------------------------------------------------------------------------------------|-----------------------------------------------------------------------|----------------------------|-------------------------------------------------------------------------------------------------------------------------------------------------------------------------------------------------------------------------------------------------------------------------------|----------------------------------------------------------------------------------------------------------------------------------------------------|------------------------------------------------------------------------------------------------------------------------------------------------------------------------------------------------------------------------------------------------------------------------------------------------------------------------------------------------------------------------------------------------------------------------------------------------------------------------------------------------|--------------------------------------------------------------------------------------------------------------------------------------------------------------------------------------------------------------------------------------------------------------------|
| Scope                                                                                                                                                                                                                                                                                                                                          | Field of application / sample type                                    | <i>Vibrio</i> species      | Brief description of procedure                                                                                                                                                                                                                                                | Genetic markers                                                                                                                                    | Performance characteristics                                                                                                                                                                                                                                                                                                                                                                                                                                                                    | Applicability / limitations                                                                                                                                                                                                                                        |
| <b>ISO 21872-1:2017/Amd 1:2023. Microbiology of the food chain – Horizontal method for the determination of <i>Vibrio</i> spp. Part 1: Detection of potentially enteropathogenic <i>Vibrio parahaemolyticus</i>, <i>Vibrio cholerae</i> and <i>Vibrio vulnificus</i>. International Organization for Standardization, Geneva, Switzerland.</b> |                                                                       |                            |                                                                                                                                                                                                                                                                               |                                                                                                                                                    |                                                                                                                                                                                                                                                                                                                                                                                                                                                                                                |                                                                                                                                                                                                                                                                    |
| Horizontal method for the detection of enteropathogenic <i>Vibrio</i> spp. (human illness in or via the intestinal tract)                                                                                                                                                                                                                      | Products for human consumption, animal feeding, environmental samples | <i>V. cholerae</i>         | <b>Enrichment:</b> test portion up to 25 g or 25 mL, 1 medium, 2 consecutive enrichments and 2 temperatures<br><b>Colony isolation:</b> 2 selective media<br><b>ID:</b> biochemical tests<br><b>ID confirmation:</b> cPCR<br><b>Pathogenicity:</b> serology (O1/O139) or cPCR | <b>ID confirmation:</b> 16S-23S rRNA ITS<br><b>Pathogenicity:</b> <i>ctx</i> gene                                                                  | <b>ILS<sup>a</sup></b><br><b>Matrix:</b> cooked prawns<br><b>LOD50:</b> 11.34 CFU/g<br><b>Sensitivity:</b> 92.5%<br><b>Specificity:</b> 84%                                                                                                                                                                                                                                                                                                                                                    | Widely used method for the detection of Vp, Vv, Vc. Well standardised protocols. Primer sets for <i>Vibrio</i> spp. ID confirmation and Vp virulence associated genes. Subculture of a small number of colonies could lead to miss potentially pathogenic strains. |
|                                                                                                                                                                                                                                                                                                                                                |                                                                       | <i>V. parahaemolyticus</i> | <b>Enrichment:</b> test portion up to 25 g or 25 mL, 1 medium, 2 consecutive enrichments and 2 temperatures<br><b>Colony isolation:</b> 2 selective media<br><b>ID:</b> biochemical tests<br><b>ID confirmation:</b> cPCR and rtPCR<br><b>Pathogenicity:</b> cPCR and rtPCR   | <b>ID confirmation:</b> <i>toxR</i> gene (cPCR and rtPCR)<br><b>Pathogenicity:</b> <i>tdh</i> and <i>trh</i> genes (cPCR), <i>tdh</i> gene (rtPCR) | <b>ILS<sup>a</sup></b><br><b>Matrix:</b> raw oysters<br><b>LOD50:</b> 0.43 CFU/g<br><b>Sensitivity:</b> 72.5-100% for Vp, 86% for <i>tdh</i> + Vp by cPCR, 94% for <i>trh</i> +Vp by cPCR, 73% for <i>tdh</i> + Vp by rtPCR<br><b>Specificity:</b> 111% <sup>b</sup> for Vp, 89% for <i>tdh</i> + Vp by cPCR, 91% for <i>trh</i> +Vp by cPCR, 94% for <i>tdh</i> + Vp by rtPCR<br><b>Matrix:</b> cooked prawns<br><b>LOD50:</b> unknown<br><b>Sensitivity:</b> 100%<br><b>Specificity:</b> 99% |                                                                                                                                                                                                                                                                    |
|                                                                                                                                                                                                                                                                                                                                                |                                                                       | <i>V. vulnificus</i>       | <b>Enrichment:</b> test portion up to 25 g or 25 mL, 1 medium, 2 consecutive enrichments and 1 temperature<br><b>Colony isolation:</b> 2 selective media<br><b>ID:</b> biochemical tests<br><b>ID confirmation:</b> cPCR and rtPCR                                            | <b>ID confirmation:</b> <i>vvhA</i> gene (cPCR and rtPCR)                                                                                          | <b>ILS<sup>a</sup></b><br><b>Matrix:</b> raw oysters<br><b>LOD50:</b> 12.31 CFU/g<br><b>Sensitivity:</b> 37.5%<br><b>Specificity:</b> 77.5%<br><b>Matrix:</b> cooked prawns                                                                                                                                                                                                                                                                                                                    |                                                                                                                                                                                                                                                                    |

LOD50: 81.2 CFU/g  
Sensitivity: 61.25-71.5%  
Specificity: 60%

**FDA-BAM (2004). Bacteriological Analytical Manual Chapter 9: Vibrio. Food & Drug Administration, Bacteriological Analytical Manual, Washington DC<sup>c</sup>**

|                                                                                                                                   |                                               |                                          |                                                                                                                                                                                                                                                                   |                                                                                                                                             |                                                                                                                                         |
|-----------------------------------------------------------------------------------------------------------------------------------|-----------------------------------------------|------------------------------------------|-------------------------------------------------------------------------------------------------------------------------------------------------------------------------------------------------------------------------------------------------------------------|---------------------------------------------------------------------------------------------------------------------------------------------|-----------------------------------------------------------------------------------------------------------------------------------------|
| Detection of human pathogenic Vibronaceae ( <i>V. cholerae</i> , <i>V. parahaemolyticus</i> and <i>V. vulnificus</i> ) in seafood | Food and water                                | <i>V. cholerae</i> ( <i>V. mimicus</i> ) | <b>Enrichment:</b> test portion 25 g, 1 medium, 1 or 2 consecutive enrichments and 2 temperatures<br><b>Colony isolation:</b> 2 selective media<br><b>ID:</b> biochemical tests, serological typing<br><b>Pathogenicity:</b> cell assay, cPCR                     | <b>Pathogenicity:</b> <i>ctx</i> gene NR                                                                                                    | Presumptive identification of Vc (no molecular characterisation or confirmation).<br>Biotyping and other tests recommended or optional. |
| Seafood (molluscan shellfish, processed food)                                                                                     | Seafood (molluscan shellfish, processed food) | <i>V. parahaemolyticus</i>               | <b>Direct plating:</b> test portion 0.1 g of homogenate, 1 selective medium, incubation at 1 temperature<br><b>ID:</b> colony hybridization (AP-probe) or multiplex cPCR<br><b>Pathogenicity:</b> colony hybridization (AP-probe and DIG-probe) or multiplex cPCR | <b>ID:</b> <i>tlh</i> gene (AP-probe, NR cPCR)<br><b>Pathogenicity:</b> <i>tdh</i> gene (AP-probe, cPCR), <i>trh</i> gene (DIG-probe, cPCR) | The use and specificity in given conditions of the <i>tlh</i> gene for Vp identification has been questioned (Yáñez et al., 2015)       |
|                                                                                                                                   |                                               | <i>V. vulnificus</i>                     | <b>Direct plating:</b> test portion 0.1 g of homogenate, 1 selective medium, incubation at 1 temperature<br><b>ID:</b> colony hybridization (DIG-probe) and cPCR                                                                                                  | <b>ID:</b> <i>vvhA</i> gene (DIG-probe, cPCR) NR                                                                                            |                                                                                                                                         |

**Standardised methods for enumeration**

**ISO/TS 21872-2:2020. Microbiology of the food chain – Horizontal method for the determination of *Vibrio* spp. Part 2: Enumeration of total and potentially enteropathogenic *Vibrio parahaemolyticus* in seafood using nucleic acid hybridization. International Organization for Standardization, Geneva, Switzerland.**

|                                                                                                                   |         |                            |                                                                                                                                                                                                                                                             |                                                                                                                                              |                                                                                                                                                                                                                                                                                                                                                                                                                                            |                                                                                                           |
|-------------------------------------------------------------------------------------------------------------------|---------|----------------------------|-------------------------------------------------------------------------------------------------------------------------------------------------------------------------------------------------------------------------------------------------------------|----------------------------------------------------------------------------------------------------------------------------------------------|--------------------------------------------------------------------------------------------------------------------------------------------------------------------------------------------------------------------------------------------------------------------------------------------------------------------------------------------------------------------------------------------------------------------------------------------|-----------------------------------------------------------------------------------------------------------|
| Method for the direct enumeration of total and potentially enteropathogenic <i>V. parahaemolyticus</i> in seafood | Seafood | <i>V. parahaemolyticus</i> | <b>Direct plating:</b> test portion 0.1 g of homogenate, 1 non-selective medium, incubation at 1 temperature, transfer of colonies to nylon membrane<br><b>ID:</b> colony hybridization (DIG-probes) for total Vp and for <i>tdh+</i> and/or <i>trh+</i> Vp | <b>ID:</b> DIG <i>toxR</i> gene (DIG-probe)<br><b>Pathogenicity:</b> <i>tdh1</i> , <i>tdh2</i> , <i>trh1</i> , <i>trh2</i> genes (DIG-probe) | <b>Single-laboratory validation</b><br><b>Matrix:</b> bivalve shellfish, finfish, cephalopods, crustaceans.<br><b>Selectivity:</b> (a) oligoprobes inclusivity: <i>toxR</i> 99.4%, <i>tdh</i> 96.7%, <i>trh</i> 97.8%; (b) oligoprobes exclusivity: 100% for all targets<br><b>Sensitivity:</b> LOD 10 CFU/g, LOQ 100 CFU/g (defined in accordance with ISO 7218)<br><b>Performance parameters:</b> accuracy and linearity, repeatability. | Accurate and specific but time consuming and technically demanding method; 0.1 g of sample analysed only. |
|-------------------------------------------------------------------------------------------------------------------|---------|----------------------------|-------------------------------------------------------------------------------------------------------------------------------------------------------------------------------------------------------------------------------------------------------------|----------------------------------------------------------------------------------------------------------------------------------------------|--------------------------------------------------------------------------------------------------------------------------------------------------------------------------------------------------------------------------------------------------------------------------------------------------------------------------------------------------------------------------------------------------------------------------------------------|-----------------------------------------------------------------------------------------------------------|

**FDM-BAM (2004) Bacteriological Analytical Manual Chapter 9: Vibrio. Food & Drug Administration, Bacteriological Analytical Manual, Washington DC<sup>c</sup>**

|                                                                      |                                               |                            |                                                                                                                                                                                                                                                   |                                                                                                                                  |                                                                                             |
|----------------------------------------------------------------------|-----------------------------------------------|----------------------------|---------------------------------------------------------------------------------------------------------------------------------------------------------------------------------------------------------------------------------------------------|----------------------------------------------------------------------------------------------------------------------------------|---------------------------------------------------------------------------------------------|
| Detection of human pathogenic Vibronaceae ( <i>Vibrio cholerae</i> , | Seafood (molluscan shellfish, processed food) | <i>V. parahaemolyticus</i> | <b>MPN format enrichment:</b> test portion 1 g and following dilutions, 1 medium, incubation at 1 temperature<br><b>Colony isolation:</b> 1 selective medium<br><b>ID:</b> biochemical tests or colony hybridization (AP-probe) or multiplex cPCR | <b>ID:</b> <i>tlh</i> gene (AP-probe, NR cPCR)<br><b>Pathogenicity:</b> <i>tdh</i> gene (AP-probe, cPCR), <i>trh</i> gene (cPCR) | Time consuming (MPN: 4-5 days, HGMF: 3-4 days).<br>Identification is only presumptive if no |
|----------------------------------------------------------------------|-----------------------------------------------|----------------------------|---------------------------------------------------------------------------------------------------------------------------------------------------------------------------------------------------------------------------------------------------|----------------------------------------------------------------------------------------------------------------------------------|---------------------------------------------------------------------------------------------|

Public health aspects of *Vibrio* spp. related to the consumption of seafood in the EU

|                                                                                |                                                                                                                                                                                                                                                                          |                                                                                                                                          |                                                                                                                                                                                                                        |
|--------------------------------------------------------------------------------|--------------------------------------------------------------------------------------------------------------------------------------------------------------------------------------------------------------------------------------------------------------------------|------------------------------------------------------------------------------------------------------------------------------------------|------------------------------------------------------------------------------------------------------------------------------------------------------------------------------------------------------------------------|
| <p><i>Vibrio parahaemolyticus</i> and <i>Vibrio vulnificus</i>) in seafood</p> | <p><b>Pathogenicity:</b> colony hybridisation (AP-probe) or multiplex cPCR</p>                                                                                                                                                                                           |                                                                                                                                          | <p>molecular confirmation is applied.<br/>Not suitable for routine analysis.<br/>The use and specificity of the <i>tth</i> gene in given conditions for Vp identification has been questioned (Yáñez et al., 2015)</p> |
|                                                                                | <p><b>HGMF:</b> test portion 0.5 g, culture on filter on 1 selective medium, incubation at 1 temperature</p> <p><b>ID:</b> presumptive enumeration based on colony colour</p>                                                                                            | <p>NR</p>                                                                                                                                |                                                                                                                                                                                                                        |
|                                                                                | <p><b>Direct plating:</b> test portion 0.1 g of homogenate, 1 non-selective medium, incubation at 1 temperature),</p> <p><b>ID:</b> colony hybridisation (AP-probe) or multiplex cPCR</p> <p><b>Pathogenicity:</b> colony hybridisation (AP-probe) or multiplex cPCR</p> | <p><b>ID:</b> <i>tth</i> gene (AP-probe, cPCR)</p> <p><b>Pathogenicity:</b> <i>tdh</i> gene (AP-probe, cPCR), <i>trh</i> gene (cPCR)</p> | <p>NR</p>                                                                                                                                                                                                              |
| <p><i>V. vulnificus</i></p>                                                    | <p><b>MPN format enrichment:</b> test portion 1 g and following dilutions, 1 medium, incubation at 1 temperature</p> <p><b>Colony isolation:</b> 2 selective media</p> <p><b>ID:</b> biochemical tests or colony hybridisation (DIG-probe) or cPCR</p>                   | <p><b>ID:</b> <i>vvhA</i> gene (DIG-probe, cPCR)</p>                                                                                     | <p>NR</p>                                                                                                                                                                                                              |

**Other methods (national standards)**

| Scope                                                                                                                                                                                                                                       | Field of application / Sample type                                                                                                       | <i>Vibrio</i> sp.                                                                                | Brief description of procedure                                                                                                                                                                                                                                                                                                                                                                                                                     | Genetic markers                                                                                                                        | Performance characteristics            | Applicability / Limitations                                                                                           |
|---------------------------------------------------------------------------------------------------------------------------------------------------------------------------------------------------------------------------------------------|------------------------------------------------------------------------------------------------------------------------------------------|--------------------------------------------------------------------------------------------------|----------------------------------------------------------------------------------------------------------------------------------------------------------------------------------------------------------------------------------------------------------------------------------------------------------------------------------------------------------------------------------------------------------------------------------------------------|----------------------------------------------------------------------------------------------------------------------------------------|----------------------------------------|-----------------------------------------------------------------------------------------------------------------------|
| <b>NMKL Method N°156, 2nd ed. 1997 (Scandinavian countries) Pathogenic <i>Vibrio</i> species. Detection and enumeration in foods</b>                                                                                                        |                                                                                                                                          |                                                                                                  |                                                                                                                                                                                                                                                                                                                                                                                                                                                    |                                                                                                                                        |                                        |                                                                                                                       |
| Detection and enumeration of <i>V. parahaemolyticus</i> , <i>V. cholerae</i> , <i>V. vulnificus</i> and <i>V. alginolyticus</i> in food                                                                                                     | Microbiological control of foods, especially shellfish, crayfish and fish. Microbial investigations in connection with disease outbreaks | <i>V. parahaemolyticus</i> , <i>V. cholerae</i> , <i>V. vulnificus</i> , <i>V. alginolyticus</i> | <b>Detection:</b> enrichment (2 media, incubation at 1 temperature), colony isolation, colony identification (type based on colour, size, aspect), ID confirmation (biochemical tests, O1/O139 antisera Vc)<br><b>Enumeration:</b> direct plating (1 selective medium, incubation at 1 temperature)                                                                                                                                                |                                                                                                                                        | Not validated in a collaborative study | Presumptive ID of colony (colony type description, colour, size, aspect)<br>Enumeration based on colony type (aspect) |
| <b>MFLP-37 (2019). Detection, isolation, and enumeration of <i>Vibrio parahaemolyticus</i> and/or <i>Vibrio vulnificus</i> in Seafood. Laboratory Procedures for the Microbiological Analysis of Foods. Volume 3. Government of Canada.</b> |                                                                                                                                          |                                                                                                  |                                                                                                                                                                                                                                                                                                                                                                                                                                                    |                                                                                                                                        |                                        |                                                                                                                       |
| Detection, isolation and enumeration of <i>V. parahaemolyticus</i> and/or <i>V. vulnificus</i> in seafood                                                                                                                                   | Seafood (fish, shellfish, crustaceans)                                                                                                   | <i>V. parahaemolyticus</i>                                                                       | <b>Enumeration:</b> MPN format enrichment (test portion 1g and following dilutions, 1 medium, incubation at 1 temperature)<br><b>Colony isolation:</b> 1 selective medium<br><b>ID:</b> biochemical tests, multiplex cPCR (described in method MLFP-23, March 2006 <sup>d</sup> ), multiplex rt PCR (described in method MLFP-102, July 2017 <sup>e</sup> )<br><b>Pathogenicity:</b> multiplex cPCR or multiplex rt PCR (as in the identification) | <b>ID:</b> R72H fragment, <i>tth</i> gene<br><b>Pathogenicity:</b> <i>tdh</i> and <i>trh</i> genes (multiplex cPCR or multiplex rtPCR) |                                        | NR                                                                                                                    |

|                      |                                                                                                                                                                                                                          |                                                                                  |
|----------------------|--------------------------------------------------------------------------------------------------------------------------------------------------------------------------------------------------------------------------|----------------------------------------------------------------------------------|
| <i>V. vulnificus</i> | <p><b>Enumeration:</b> MPN format enrichment (test portion 1g and following dilutions, 1 medium, incubation at 1 temperature)</p> <p><b>Colony isolation:</b> 1 selective medium</p> <p><b>ID:</b> biochemical tests</p> | Presumptive identification of Vv (no molecular characterisation or confirmation) |
|----------------------|--------------------------------------------------------------------------------------------------------------------------------------------------------------------------------------------------------------------------|----------------------------------------------------------------------------------|

**GB 4789.7-2013. National Food Safety Standard – Microbiological Examination of Food Hygiene – Examination of *Vibrio parahaemolyticus*. National Standard of the People’s Republic of China**

|                                                                 |                                           |                            |                                                                                                                                                                                                                                                                                                                                                                                                                                                     |                                                                                  |
|-----------------------------------------------------------------|-------------------------------------------|----------------------------|-----------------------------------------------------------------------------------------------------------------------------------------------------------------------------------------------------------------------------------------------------------------------------------------------------------------------------------------------------------------------------------------------------------------------------------------------------|----------------------------------------------------------------------------------|
| Method for the inspection of <i>V. parahaemolyticus</i> in food | Fish, cephalopods, shellfish, crustaceans | <i>V. parahaemolyticus</i> | <p><b>Detection:</b> enrichment (test portion 25 g, 1 medium, incubation at 1 temperature), colony isolation (1 selective medium), colony identification (biochemical tests, serological typing)</p> <p><b>Enumeration:</b> MPN format enrichment (test portion of 2.5 g and continuous dilutions, 1 medium, incubation at 1 temperature), colony isolation (1 selective medium), colony identification (biochemical tests, serological typing)</p> | Presumptive identification of Vp (no molecular characterisation or confirmation) |
|-----------------------------------------------------------------|-------------------------------------------|----------------------------|-----------------------------------------------------------------------------------------------------------------------------------------------------------------------------------------------------------------------------------------------------------------------------------------------------------------------------------------------------------------------------------------------------------------------------------------------------|----------------------------------------------------------------------------------|

**GB 4789.44-2020. National Food Safety Standard – Microbiological Examination of Food Hygiene – Examination of *Vibrio vulnificus*. National Standard of the People’s Republic of China**

|                                                                        |                                            |                      |                                                                                                                                                                                                                                                              |                                                                                                                                                      |
|------------------------------------------------------------------------|--------------------------------------------|----------------------|--------------------------------------------------------------------------------------------------------------------------------------------------------------------------------------------------------------------------------------------------------------|------------------------------------------------------------------------------------------------------------------------------------------------------|
| Method for the examination of <i>V. vulnificus</i> in aquatic products | Fish, shrimp, crab, shellfish, cephalopods | <i>V. vulnificus</i> | <p><b>Detection:</b> enrichment (1 selective medium, incubation at 1 temperature), PCR testing and colony isolation (2 selective media), colony identification (biochemical tests and cPCR identification (optional) and typing/pathogenicity (optional)</p> | <p><b>ID:</b> vvhA gene (cPCR) NR</p> <p><b>Typing/pathogenicity:</b> 16S rRNA A/B, <i>SerE</i> gene, <i>Bt2</i> gene, <i>vcgC/E</i> genes cPCR)</p> |
|------------------------------------------------------------------------|--------------------------------------------|----------------------|--------------------------------------------------------------------------------------------------------------------------------------------------------------------------------------------------------------------------------------------------------------|------------------------------------------------------------------------------------------------------------------------------------------------------|

Abbreviations: AP-probe, alkaline phosphatase labelled probe; cPCR, conventional PCR; DIG-probe, digoxigenin labelled probe; HGMF, hydrophobic grid membrane filtration; ID, identification; ILS, inter-laboratory study; ITS, internal transcribed spacer; LOD, limit of detection; LOQ, limit of quantification; MPN, most probable number; NR, not reported; PCR, polymerase chain reaction; rtPCR, real-time PCR; Va, *Vibrio alginolyticus*; Vc, *V. cholerae*; Vm, *V. mimicus*; Vp, *V. parahaemolyticus*; Vv, *V. vulnificus*.

<sup>a</sup>An international inter-laboratory study, ILS (Hartnell et al., 2019) using the method specified in the ISO 21872:2017 was carried out for detection of *V. parahaemolyticus*, *V. vulnificus* and *V. cholerae* in raw and cooked seafood (Hartnell et al., 2019). Real-time PCR for identification of *V. cholerae* and detection of *trh* genes of *V. parahaemolyticus* was tested in this international ILS, but the data were not reliable and were therefore excluded from the final ILS dataset.

<sup>b</sup>The specificity calculated for *V. parahaemolyticus* (111%) was due to positive signals/identification obtained by cPCR in control samples.

<sup>c</sup><https://www.fda.gov/food/laboratory-methods-food/bam-chapter-9-vibrio>, accessed on the 14 May 2024.

<sup>d</sup>MFLP-23, March 2006: Specific detection of *Vibrio parahaemolyticus* strains using a multiplex polymerase chain reaction (PCR) based on R72H taxonomic marker and the haemolysin genes TDH and TRH.

<sup>e</sup>MFLP-102, July 2017: Identification of *Vibrio parahaemolyticus* colonies by real-time polymerase chain reaction.

## References

- Hartnell, R. E., Stockley, L., Keay, W., Rosec, J. P., Hervio-Heath, D., Van den Berg, H., Leoni, F., Ottaviani, D., Henigman, U., Denayer, S., Serbruyns, B., Georgsson, F., Krumova-Valcheva, G., Gyurova, E., Blanco, C., Copin, S., Strauch, E., Wiczorek, K., Lopatek, M., ... Baker-Austin, C. (2019). A pan-European ring trial to validate an international standard for detection of *Vibrio cholerae*, *Vibrio parahaemolyticus* and *Vibrio vulnificus* in seafoods. *International Journal of Food Microbiology*, 288, 58–65. <https://doi.org/10.1016/j.ijfoodmicro.2018.02.008>
- Yáñez, R., Bastías, R., Higuera, G., Salgado, O., Katharios, P., Romero, J., Espejo, R., & García, K. (2015). Amplification of *tlh* gene in other Vibrionaceae specie by specie-specific multiplex PCR of *Vibrio parahaemolyticus*. *Electronic Journal of Biotechnology*, 18(6), 459-463. <https://doi.org/10.1016/j.ejbt.2015.09.007>
